# Supplementary material
Source: PubMed Central journal article supplement (PMC2775653)
Supplement: jc.2009-1308_1.pdf [file jc.2009-1308_1.pdf]

**Supplemental Table 1**

| <b>ID</b> | <b>Entry</b> | <b>AD</b> | <b>DM</b> | <b>Highest 21OH antibody level</b> | <b>HLA DRB</b>  | <b>MICA</b>    |
|-----------|--------------|-----------|-----------|------------------------------------|-----------------|----------------|
| 220835    | AD referral  | yes       | yes       | 0.725                              | DR3/3           | 5.1/4          |
| 224524    | AD referral  | yes       | yes       | 0.419                              | <b>DR3/0404</b> | 5.1/4          |
| 220333    | AD referral  | yes       | yes       | 1.276                              | DR3/9           | 5.1/4          |
| 215104    | AD referral  | yes       | yes       | 0.655                              | DR3/3           | <b>5.1/5.1</b> |
| 203052    | AD referral  | yes       | yes       | 1.311                              | DR5/5           | 5.1/9          |
| 213488    | AD referral  | yes       | yes       | 0.58                               | DR3/6           | <b>5.1/5.1</b> |
| 215379    | AD referral  | yes       | yes       | 0.817                              | DR3/8           | <b>5.1/5.1</b> |
| 213275    | AD referral  | yes       | yes       | 0.832                              | <b>DR3/0401</b> | <b>5.1/5.1</b> |
| 212450    | AD referral  | yes       | yes       | 2.054                              | <b>DR3/0404</b> | <b>5.1/5.1</b> |
| 224737    | AD referral  | yes       | yes       | 0.676                              | <b>DR3/0401</b> | <b>5.1/5.1</b> |
| 221734    | AD referral  | yes       | yes       | 0.828                              | DR4A**/0404     | <b>5.1/5.1</b> |
| 202566    | AD referral  | yes       | no        | 0.42                               | DR3/3           | <b>5.1/5.1</b> |
| 211372    | AD referral  | yes       | no        | 0.99                               | DR2/5           | <b>5.1/5.1</b> |
| 211586    | AD referral  | yes       | no        | 0.822                              | <b>DR3/0404</b> | <b>5.1/5.1</b> |
| 211589    | AD referral  | yes       | no        | 0.987                              | <b>DR3/0404</b> | <b>5.1/5.1</b> |
| 211657    | AD referral  | yes       | no        | 0.961                              | DR2/5           | 6/9            |
| 211680    | AD referral  | yes       | no        | 1.336                              | <b>DR3/0404</b> | <b>5.1/5.1</b> |
| 211683    | AD referral  | yes       | no        | 1.081                              | <b>DR3/0404</b> | <b>5.1/5.1</b> |
| 211830    | AD referral  | yes       | no        | 3.206                              | <b>DR3/0404</b> | <b>5.1/5.1</b> |
| 211847    | AD referral  | yes       | no        | 1.427                              | <b>DR3/0401</b> | 5.1/6          |
| 211848    | AD referral  | yes       | no        | 2.263                              | <b>DR3/0404</b> | 5.1/9          |
| 212447    | AD referral  | yes       | no        | 1.501                              | <b>DR3/0404</b> | <b>5.1/5.1</b> |
| 212522    | AD referral  | yes       | no        | 0.249                              | <b>DR3/0404</b> | <b>5.1/5.1</b> |
| 212642    | AD referral  | yes       | no        | 0.573                              | DR1/5           | <b>5.1/5.1</b> |
| 212770    | AD referral  | yes       | no        | 0.43                               | <b>DR3/0404</b> | <b>5.1/5.1</b> |
| 212782    | AD referral  | yes       | no        | 1.069                              | <b>DR3/0404</b> | <b>5.1/5.1</b> |
| 212783    | AD referral  | yes       | no        | 1.403                              | <b>DR3/0404</b> | <b>5.1/5.1</b> |
| 212802    | AD referral  | yes       | no        | 0.944                              | DR2/5           | 6/9            |
| 212868    | AD referral  | yes       | no        | 1.771                              | <b>DR3/0404</b> | 4/9            |
| 212880    | AD referral  | yes       | no        | 1.236                              | DR2/7           | 5.1/6          |
| 213170    | AD referral  | yes       | no        | 0.74                               | DR0401/4A**     | <b>5.1/5.1</b> |
| 213191    | AD referral  | yes       | no        | 1.113                              | DR3/5           | <b>5.1/5.1</b> |
| 213306    | AD referral  | yes       | no        | 0.655                              | <b>DR3/0404</b> | 5.1/9          |
| 213563    | AD referral  | yes       | no        | 1.231                              | <b>DR3/0404</b> | 5.1/9          |
| 213603    | AD referral  | yes       | no        | 0.817                              | DR2/3           | <b>5.1/5.1</b> |
| 213773    | AD referral  | yes       | no        | 0.739                              | DR2/0403        | <b>5.1/5.1</b> |
| 213855    | AD referral  | yes       | no        | 0.286                              | DR0401/5        | <b>5.1/5.1</b> |
| 214030    | AD referral  | yes       | no        | 1.385                              | <b>DR3/0403</b> | 5.1/4          |
| 214059    | AD referral  | yes       | no        | 2.274                              | <b>DR3/0404</b> | 5.1/not 5.1    |
| 214062    | AD referral  | yes       | no        | 2.054                              | DR3/5           | 5.1/4          |

|        |                     |     |     |       |                 |                |
|--------|---------------------|-----|-----|-------|-----------------|----------------|
| 214079 | AD referral         | yes | no  | 1.909 | DR4/5           | <b>5.1/5.1</b> |
| 214088 | AD referral         | yes | no  | 0.404 | <b>DR3/0403</b> | 5.1/4          |
| 214279 | AD referral         | yes | no  | 1.317 | DR2/3           | <b>5.1/5.1</b> |
| 214288 | AD referral         | yes | no  | 0.983 | DR3/5           | 5.1/9          |
| 214333 | AD referral         | yes | no  | 1.075 | DR3/5           | 5.1/4          |
| 214540 | AD referral         | yes | no  | 1.25  | DR2/2           | 5.1/6          |
| 214628 | AD referral         | yes | no  | 1.283 | DR3/4A**        | 5.1/6          |
| 214649 | AD referral         | yes | no  | 1.428 | DR3/5           | 5.1/5          |
| 214748 | AD referral         | yes | no  | 2.948 | <b>DR3/0404</b> | <b>5.1/5.1</b> |
| 215107 | AD referral         | yes | no  | 1.373 | <b>DR3/0404</b> | <b>5.1/5.1</b> |
| 218532 | AD referral         | yes | no  | 0.594 | <b>DR3/0401</b> | 5.1/4          |
| 219885 | AD referral         | yes | no  | 0.835 | <b>DR3/0404</b> | <b>5.1/5.1</b> |
| 222016 | AD referral         | yes | no  | 0.743 | DR0404/0404     | <b>5.1/5.1</b> |
| 222654 | AD referral         | yes | no  | 0.824 | DR1/0402        | 4/9            |
| 223462 | AD referral         | yes | no  | 0.829 | DR3/3           | <b>5.1/5.1</b> |
| 223508 | AD referral         | yes | no  | 0.9   | DR2/3           | <b>5.1/5.1</b> |
| 223608 | AD referral         | yes | no  | 0.851 | Not DQ8*        | 5.1/6          |
| 225146 | AD referral         | yes | no  | 1.186 | DR4A**/5        | 5.1/5          |
| 225240 | AD referral         | yes | no  | 0.994 | <b>DR3/0404</b> | <b>5.1/5.1</b> |
| 225487 | AD referral         | yes | no  | 1.06  | <b>DR3/0404</b> | <b>5.1/5.1</b> |
| 225811 | AD referral         | yes | no  | 1.124 | <b>DR3/0401</b> | 5.1/6          |
| 225814 | AD referral         | yes | no  | 1.014 | DR3/3           | <b>5.1/5.1</b> |
| 226115 | AD referral         | yes | no  | 0.749 | DR1/3           | 5.1/9          |
| 210091 | 21OH+<br>Progressor | yes | yes | 1.064 | <b>DR3/0404</b> | <b>5.1/5.1</b> |
| 210092 | 21OH+<br>Progressor | yes | yes | 2.079 | <b>DR3/0404</b> | <b>5.1/5.1</b> |
| 210944 | 21OH+<br>Progressor | yes | yes | 1.168 | DR3/3           | <b>5.1/5.1</b> |
| 212144 | 21OH+<br>Progressor | yes | no  | 1.659 | DR3/3           | <b>5.1/5.1</b> |
| 212263 | 21OH+<br>Progressor | yes | yes | 1.589 | DR0106/3        | 5.1/6          |
| 212779 | 21OH+<br>Progressor | yes | yes | 2.092 | <b>DR3/0404</b> | <b>5.1/5.1</b> |
| 212943 | 21OH+<br>Progressor | yes | yes | 1.171 | <b>DR3/0404</b> | <b>5.1/5.1</b> |
| 215070 | 21OH+<br>Progressor | yes | yes | 2.091 | DR3/0701        | <b>5.1/5.1</b> |
| 220066 | 21OH+<br>Progressor | yes | yes | 1.347 | <b>DR3/0401</b> | <b>5.1/5.1</b> |
| 225559 | 21OH+<br>Progressor | yes | yes | 1.638 | <b>DR3/0404</b> | 5.1/6          |
| 217921 | 21OH+<br>Progressor | yes | yes | 2.081 | <b>DR3/0404</b> | 5.1/9          |

|        |       |    |     |       |                 |                |
|--------|-------|----|-----|-------|-----------------|----------------|
| 200166 | 21OH+ | no | yes | 1.325 | <b>DR3/0404</b> | 5.1/9          |
| 201315 | 21OH+ | no | yes | 1.327 | <b>DR3/0404</b> | <b>5.1/5.1</b> |
| 201602 | 21OH+ | no | yes | 1.367 | DR4A**/0404     | 4/9            |
| 206568 | 21OH+ | no | yes | 1.667 | DR0401/5        | 5/9            |
| 207946 | 21OH+ | no | yes | 0.933 | <b>DR3/0403</b> | 5.1/5          |
| 209365 | 21OH+ | no | yes | 1.107 | DR2/3           | 5.1/9          |
| 210869 | 21OH+ | no | yes | 0.324 | DR0401/0404     | 5.1/5          |
| 211758 | 21OH+ | no | yes | 1.442 | <b>DR3/0401</b> | 5/9            |
| 211760 | 21OH+ | no | yes | 1.049 | <b>DR3/0401</b> | 5.1/5          |
| 211832 | 21OH+ | no | yes | 2.096 | <b>DR3/0401</b> | <b>5.1/5.1</b> |
| 212222 | 21OH+ | no | yes | 1.772 | <b>DR3/0404</b> | <b>5.1/5.1</b> |
| 212229 | 21OH+ | no | yes | 0.968 | DR0401/0401     | 5/6            |
| 212471 | 21OH+ | no | yes | 1.084 | DR0401/0401     | 5.1/5          |
| 212594 | 21OH+ | no | yes | 0.19  | DR2/7           | 5.1/5          |
| 212669 | 21OH+ | no | no  | 1.789 | DR2/3           | 5.1/5          |
| 212701 | 21OH+ | no | yes | 0.864 | DR3/5           | 5.1/6          |
| 212942 | 21OH+ | no | no  | 0.435 | DR2/3           | 5.1/5          |
| 213073 | 21OH+ | no | yes | 1.245 | DR1/4A**        | 5.1/9          |
| 213150 | 21OH+ | no | yes | 2.989 | <b>DR3/0401</b> | 5.1/5          |
| 213614 | 21OH+ | no | no  | 0.963 | DR3/6           | 5.1/5          |
| 213702 | 21OH+ | no | yes | 1.687 | DR0401/0404     | 5.1/4          |
| 213868 | 21OH+ | no | yes | 1.987 | <b>DR3/0401</b> | 5.1/6          |
| 214365 | 21OH+ | no | yes | 2.87  | DR2/0404        | 5.1/6          |
| 214435 | 21OH+ | no | yes | 2.165 | <b>DR3/0404</b> | 4/9            |
| 214680 | 21OH+ | no | yes | 0.879 | DR1/0402        | 5.1/9          |
| 215260 | 21OH+ | no | yes | 1.365 | DR0401/0404     | <b>5.1/5.1</b> |
| 215354 | 21OH+ | no | no  | 1.536 | DR4A**/0404     | 6/9            |
| 215355 | 21OH+ | no | no  | 1.324 | DR0401/0404     | 5.1/6          |
| 215398 | 21OH+ | no | yes | 0.335 | <b>DR3/0404</b> | 5/6            |
| 215406 | 21OH+ | no | yes | 2.114 | DR0404/6        | 5.1/5          |
| 215557 | 21OH+ | no | yes | 1.163 | <b>DR3/0404</b> | 4/5            |
| 215706 | 21OH+ | no | yes | 0.813 | DR5/7           | 4/9            |
| 215951 | 21OH+ | no | yes | 1.028 | <b>DR3/0404</b> | 5.1/4          |
| 217235 | 21OH+ | no | yes | 0.38  | DR1/4           | <b>5.1/5.1</b> |
| 217912 | 21OH+ | no | yes | 0.214 | DR3/3           | 5.1/6          |
| 217935 | 21OH+ | no | yes | 0.487 | <b>DR3/0401</b> | <b>5.1/5.1</b> |
| 218387 | 21OH+ | no | no  | 0.462 | DR2/3           | 5.1/4          |
| 219111 | 21OH+ | no | yes | 0.568 | <b>DR3/0404</b> | 5.1/5          |
| 219362 | 21OH+ | no | yes | 1.174 | <b>DR3/0404</b> | 5.1/4          |
| 220432 | 21OH+ | no | yes | 0.812 | Not DQ8*        | 5/6            |
| 220463 | 21OH+ | no | yes | 1.179 | <b>DR3/0401</b> | 5.1/6          |
| 220723 | 21OH+ | no | yes | 0.887 | DR4/8           | 5.1/9          |
| 221440 | 21OH+ | no | yes | 1.352 | <b>DR3/0404</b> | <b>5.1/5.1</b> |
| 221811 | 21OH+ | no | yes | 0.99  | DR0404/0404     | 5.1/6          |
| 222356 | 21OH+ | no | yes | 0.96  | DR0401/8        | 5/9            |

|        |       |    |     |       |                 |                |
|--------|-------|----|-----|-------|-----------------|----------------|
| 224033 | 21OH+ | no | yes | 1.33  | <b>DR3/0404</b> | 5.1/4          |
| 224042 | 21OH+ | no | yes | 0.983 | DR1/0401        | 5.1/5          |
| 224618 | 21OH+ | no | yes | 1.155 | <b>DR3/0401</b> | <b>5.1/5.1</b> |
| 225026 | 21OH+ | no | yes | 1.006 | <b>DR3/0407</b> | <b>5.1/5.1</b> |
| 225866 | 21OH+ | no | yes | 0.8   | <b>DR3/0404</b> | 5/9            |
| 226238 | 21OH+ | no | yes | 0.882 | DR0404/5        | 5/9            |
| 226445 | 21OH+ | no | no  | 1.015 | DR0404/8        | 4/6            |

\* Indicates insufficient DNA for complete DRB1 typing.

\*\* Indicates DR4 haplotypes that do not have DQB1\*0302
